# Supplementary material for: Autonomous TNF is critical for in vivo monocyte survival in steady state and inflammation
Source: PubMed Central journal article supplement — J Exp Med. 2017 Apr 3;214(4):905–17. doi: 10.1084/jem.20160499 (PMC5379969; doi:10.1084/jem.20160499), 2017-04-03
Supplement: JEM_20160499_sm.pdf [file JEM_20160499_sm.pdf]

SUPPLEMENTAL MATERIAL

Wolf et al., <https://doi.org/10.1084/jem.20160499>

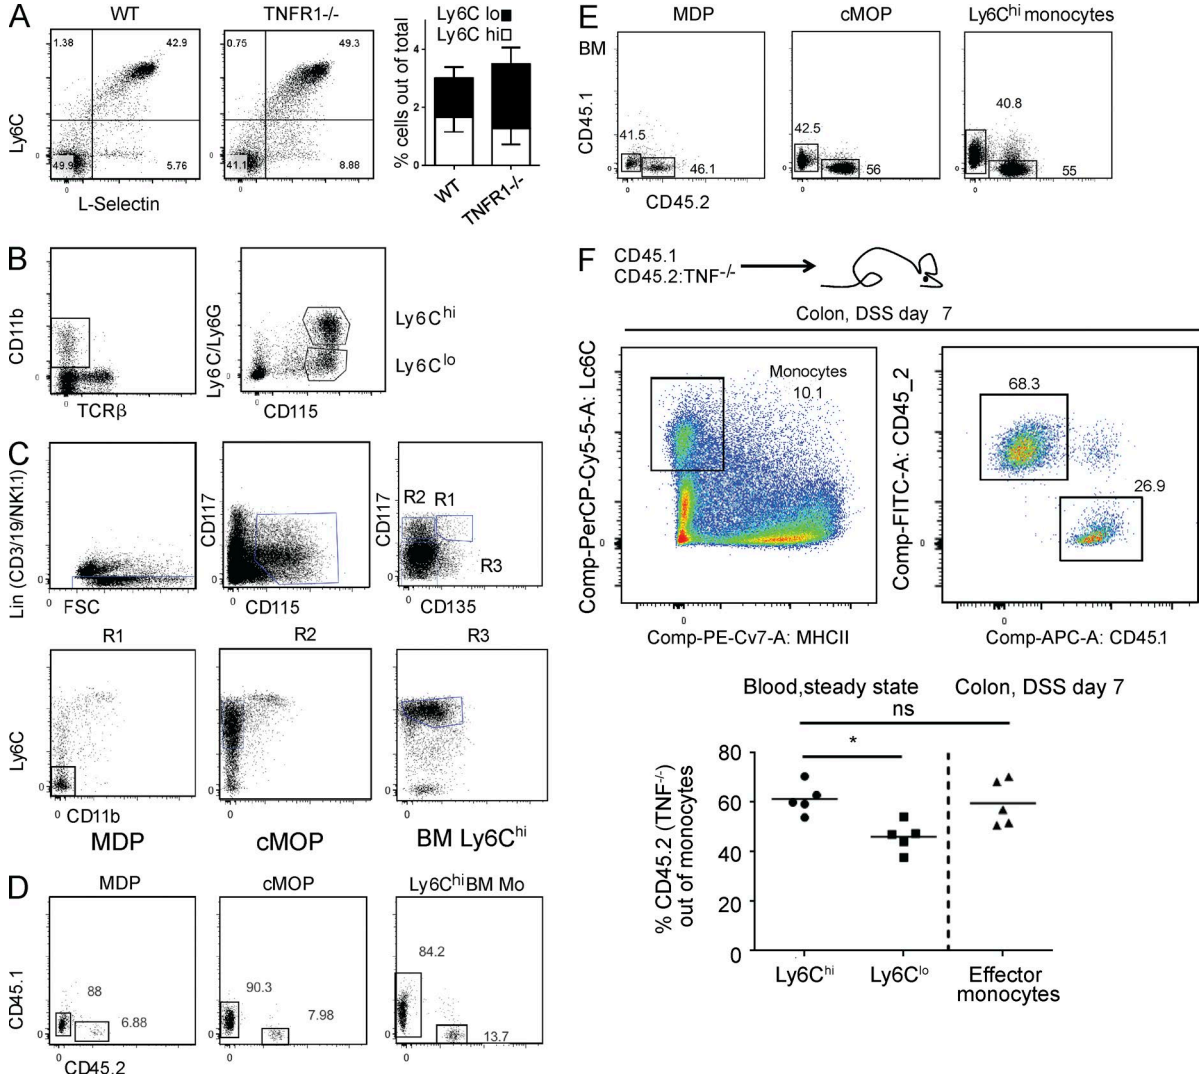

Figure S1. **Flow cytometric analysis of monocytes and monocyte precursors in the BM.** (A) FACS analysis of blood monocytes from nonchimeric WT and TNFR1<sup>-/-</sup> mice in steady state. *n* = 8. Results are expressed as means ± SEM. (B) FACS analysis illustrating definition of blood monocyte subsets. (C) FACS analysis illustrating definition of monocyte precursors. FSC, forward scatter. (D) FACS analysis of myeloid BM precursors: MDPs, cMOPs, and BM Ly6C<sup>hi</sup> monocytes in [TNFR1<sup>-/-</sup>/WT > WT] mixed BM chimeras. (E) FACS analysis of indicated myeloid BM precursors in [TNF/WT > WT] mixed BM chimeras as in F. Mo, monocyte. (F) FACS analysis of colons of [CD45.2 TNF<sup>-/-</sup>/CD45.1 WT > WT] mice treated with 2% DSS for 7 d. Each mouse was assessed for frequency of CD45.2<sup>+</sup> steady-state blood monocytes before DSS administration, as in Fig. 1 E. *n* = 5. \*, *P* < 0.05; Mann-Whitney *U* test was used.

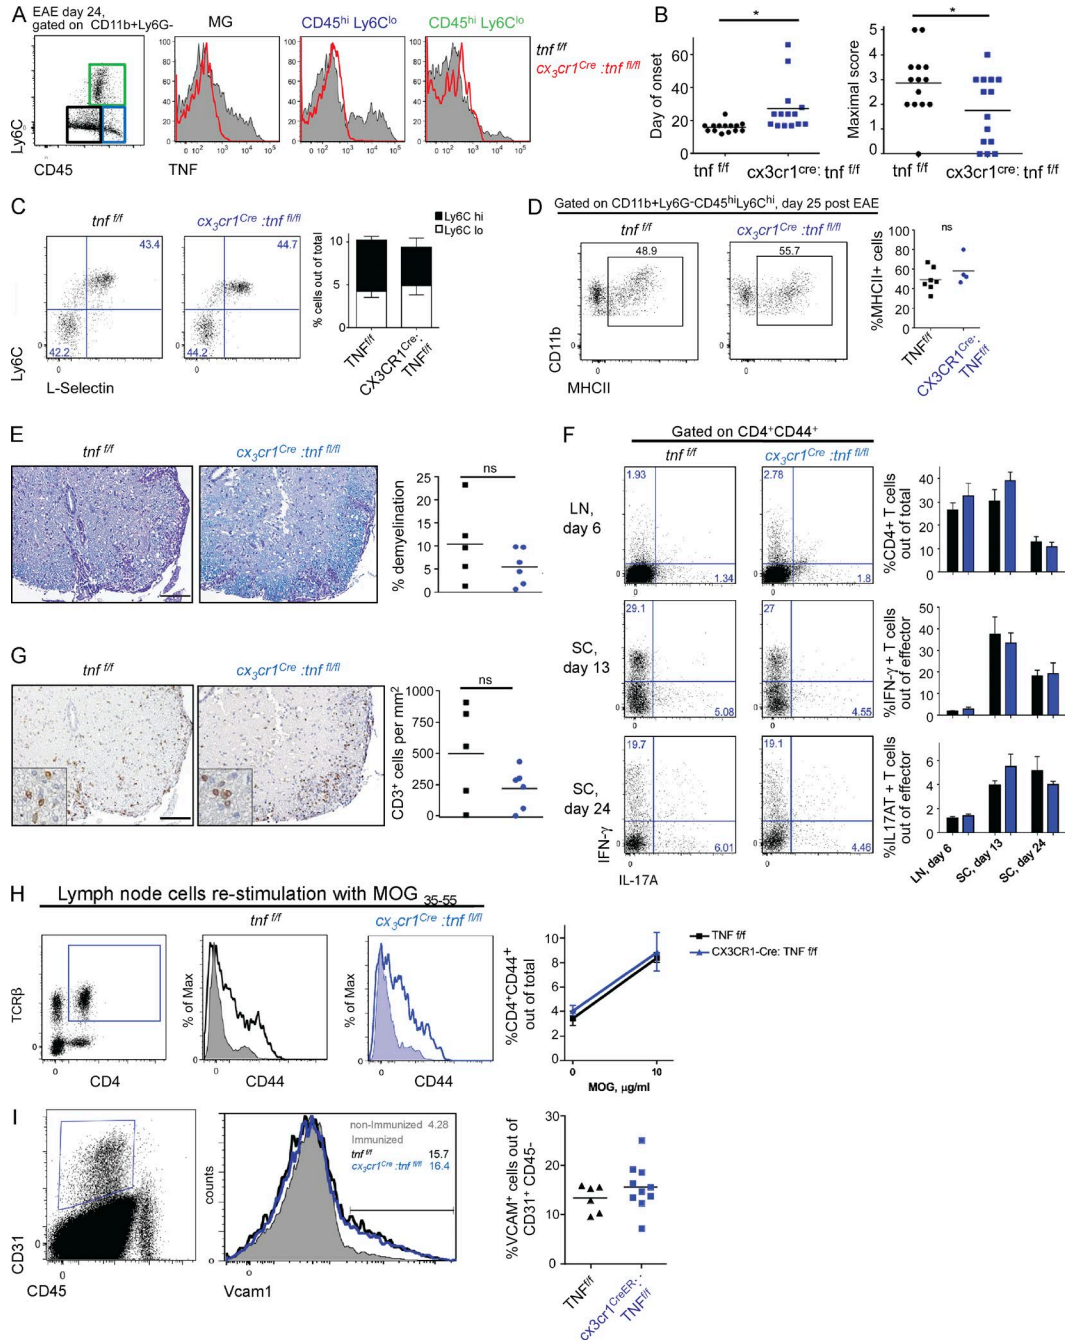

Figure S2. **Additional characterization of *cx3cr1<sup>Cre</sup>:tnf<sup>fl/fl</sup>* mice.** (A) FACS analysis of intracellular TNF expression in different myeloid populations in the inflamed spinal cord of *tnf<sup>fl/fl</sup>* and *cx3cr1<sup>Cre</sup>:tnf<sup>fl/fl</sup>* mice. MG, microglia. (B) Pooled day-of-onset (left) and maximal-score (right) data of MOG<sub>35-55</sub>-immunized *tnf<sup>fl/fl</sup>* and *cx3cr1<sup>Cre</sup>:tnf<sup>fl/fl</sup>* mice from three independent experiments. *n* = 14. \*, *P* < 0.05. Student's *t* test was used. (C) FACS analysis of blood monocytes from *tnf<sup>fl/fl</sup>* and *cx3cr1<sup>Cre</sup>:tnf<sup>fl/fl</sup>* mice in steady state. *n* = 8–7. (D) FACS analysis of CD45<sup>hi</sup>Ly6C<sup>hi</sup>MHCII<sup>+</sup> effector monocytes (gated as in Fig. 3 A) from spinal cords of MOG<sub>35-55</sub>-immunized *tnf<sup>fl/fl</sup>* and *cx3cr1<sup>Cre</sup>:tnf<sup>fl/fl</sup>* mice 24 d after immunization (the same cells are shown also in Fig. 4 C). *n* = 4–7. (E) Histological analysis of demyelination by luxol-fast blue stain in spinal cords of in *tnf<sup>fl/fl</sup>* and *cx3cr1<sup>Cre</sup>:tnf<sup>fl/fl</sup>* mice at day 24 after immunization. *n* = 5–6. (F) FACS analysis of Th1 and Th17 cells in lymph nodes (LN) at day 6 after immunization or in spinal cord (SC) at days 13 and 24 in *tnf<sup>fl/fl</sup>* and *cx3cr1<sup>Cre</sup>:tnf<sup>fl/fl</sup>*. *n* = 4–6. (G) CD3 histological stain in spinal cords of *tnf<sup>fl/fl</sup>* and *cx3cr1<sup>Cre</sup>:tnf<sup>fl/fl</sup>* mice at day 24 after immunization. *n* = 5–6. (E and G) Bars, 100 μm. (H) FACS analysis of lymph node T cells of *tnf<sup>fl/fl</sup>* and *cx3cr1<sup>Cre</sup>:tnf<sup>fl/fl</sup>* mice immunized with MOG<sub>35-55</sub> in vivo and restimulated ex vivo with 10 μg/ml MOG<sub>35-55</sub>. Shaded histograms represent nonstimulated cells. Unshaded histograms represent stimulated cells. *n* = 3 biological repeats. (I) FACS analysis for the activation marker VCAM1 on endothelial cells (CD31<sup>+</sup>CD45<sup>-</sup>) isolated from spinal cord of *tnf<sup>fl/fl</sup>* and *cx3cr1<sup>Cre</sup>:tnf<sup>fl/fl</sup>* mice 9 d after MOG<sub>35-55</sub> immunization. *n* = 6–10. Results are expressed as means ± SEM.

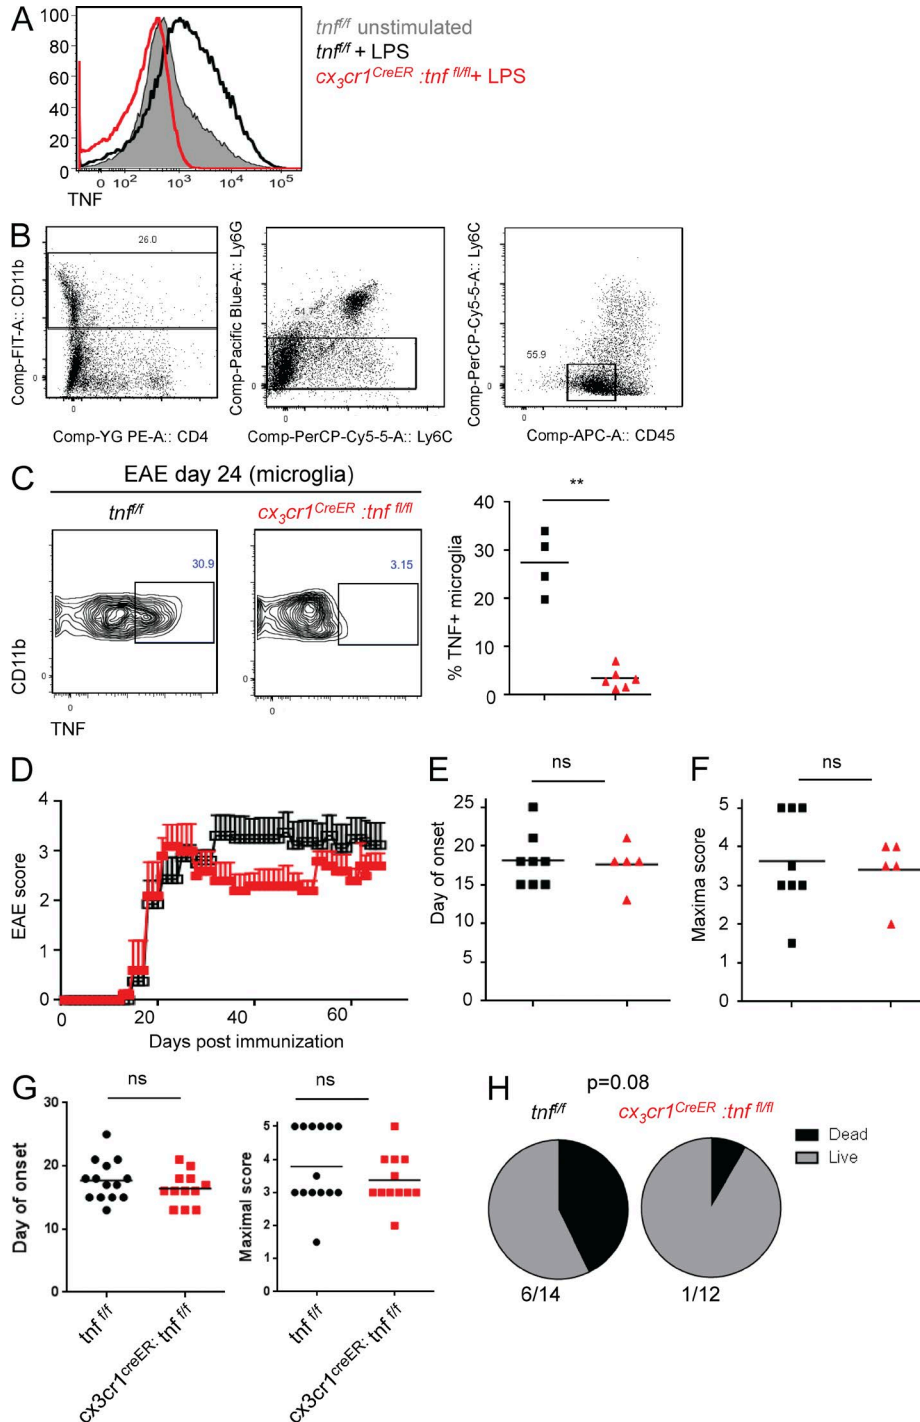

Tables S1 and S2 are included as Excel files. Table S1 lists genes up-regulated in spinal cord effector monocytes at EAE day 9 compared with Ly6C<sup>hi</sup> monocytes. Table S2 lists genes down-regulated in spinal cord effector monocytes at EAE day 9 compared with Ly6C<sup>hi</sup> monocytes.
